# Supplementary material for: Positive transcription elongation factor b (P-TEFb) is a therapeutic target in human multiple myeloma
Source: PubMed Central journal article supplement (PMC5601747; doi:10.18632/oncotarget.19761), 2017-08-01
Supplement: oncotarget-08-59476-s001.pdf [file oncotarget-08-59476-s001.pdf]

## Positive transcription elongation factor b (P-TEFb) is a therapeutic target in human multiple myeloma

### SUPPLEMENTARY MATERIALS

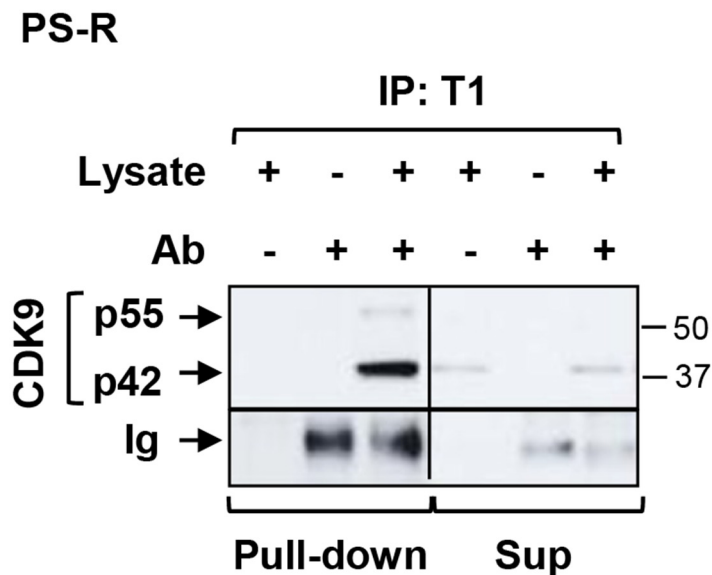

**Supplementary Figure 1: Cyclin T1 co-immunoprecipitates with CDK9 in bortezomib-resistant MM cells.** PS-R (bortezomib-resistant U266) cells were lysed in 1% CHAPs buffer and subjected to immunoprecipitation. IP was carried out in pull-down and supernatant sections individually with cyclin T1 antibody, and immunoblotted for CDK9.

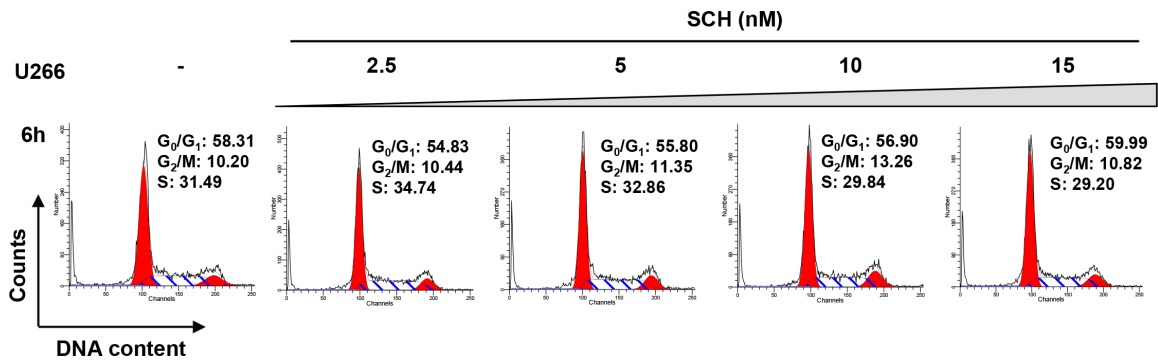

**Supplementary Figure 2: Dinaciclib (SCH) kills MM cells prior to disruption of the cell cycle.** U266 cells were exposed to SCH (2.5 nM to 15 nM) for 6 hr, after which cell cycle analysis was performed by PI staining and flow cytometry. Values indicate the percentage of cells in G<sub>0</sub>/G<sub>1</sub>, S, or G<sub>2</sub>/M. Duplicate experiments yielded equivalent results.

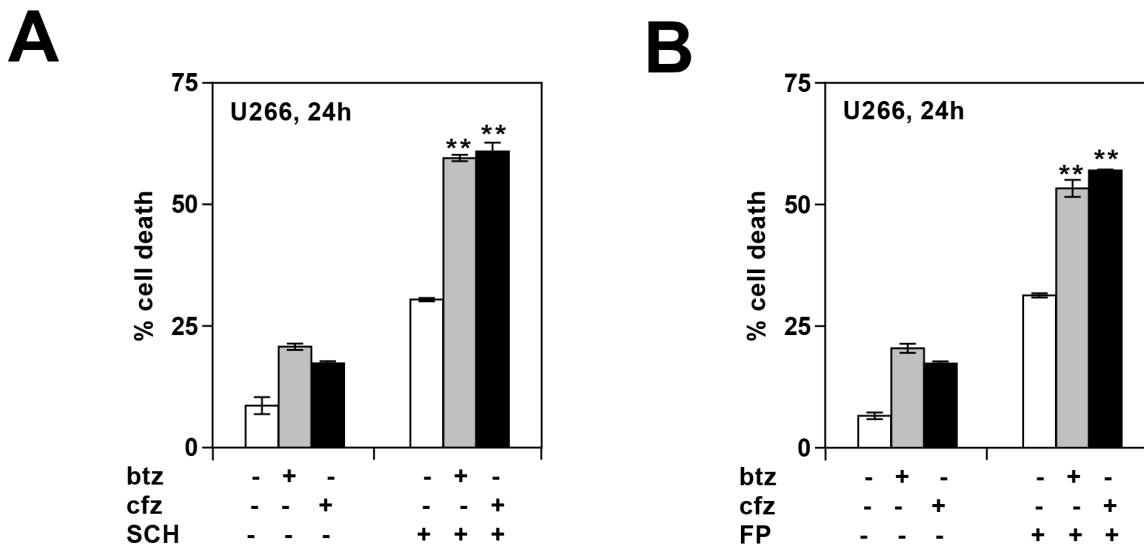

**Supplementary Figure 3: Genetic or pharmacologic CDK9 inhibition promotes proteasome inhibitor (PI) lethality in bortezomib-sensitive MM cells.** (A) U266 cells were treated with btz (2 nM) or cfz (5 nM) with or without dinaciclib (SCH; 7 nM) for 24 hr, and then analyzed by flow cytometry to determine the percentage of apoptotic cells. Cell death (7-AAD) was analyzed by flow cytometry. Significantly greater than control; \*\* = P < 0.01. (B) U266 cells were treated with btz (2 nM) or cfz (5 nM) with or without alvocidib (FP; 150 nM) for 24 hr, and then analyzed by flow cytometry to determine the percentage of apoptotic cells. Significantly greater than control; \*\* = P < 0.01.

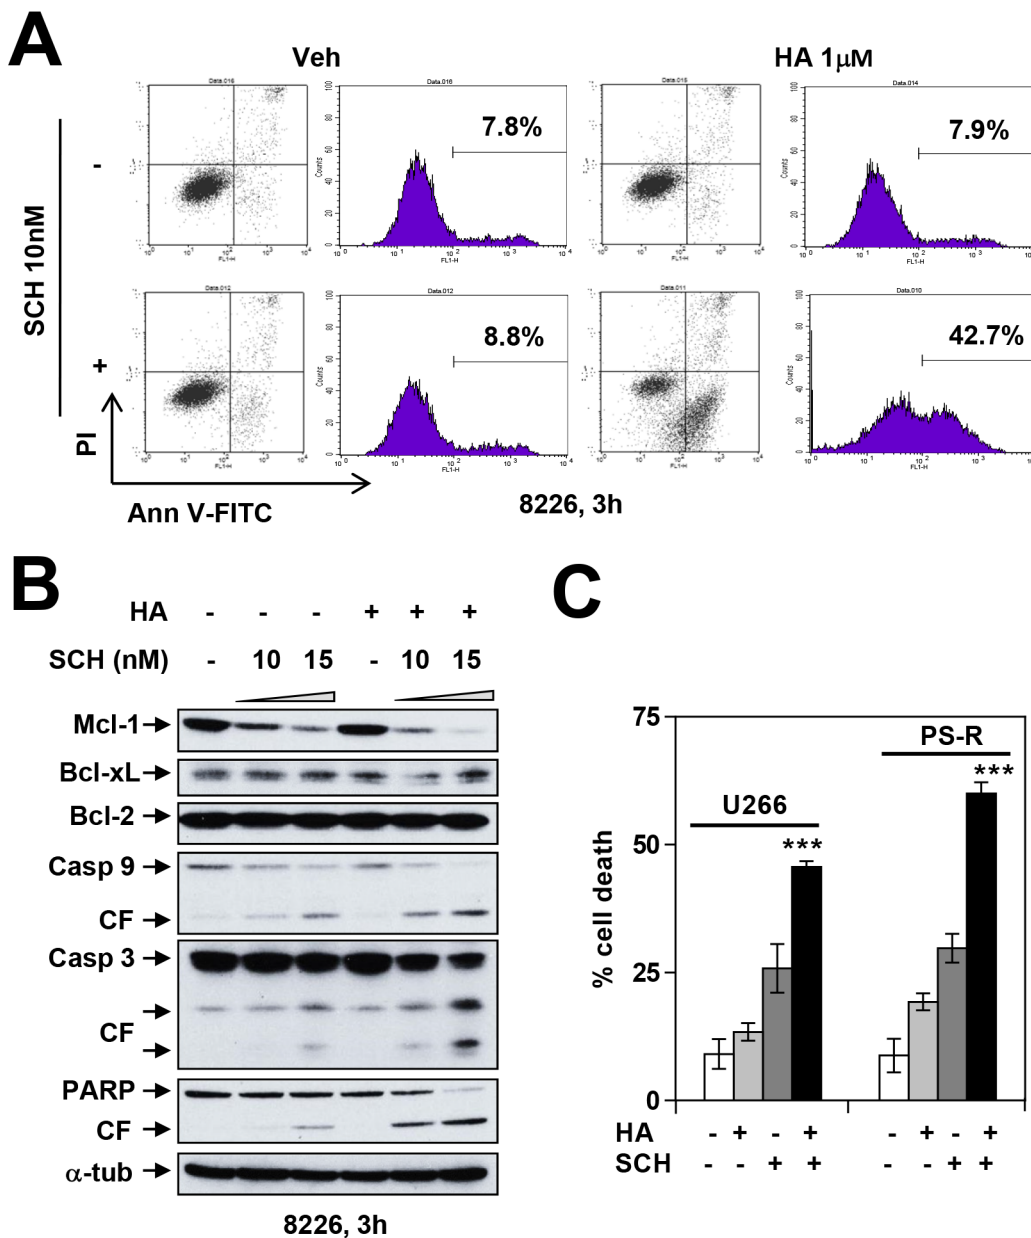

**Supplementary Figure 4: Dinaciclib markedly increases HA-14-induced cell death in both sensitive and bortezomib-resistant MM cells.** (A) RPMI8226 cells were exposed to dinaciclib (SCH; 10 nM) with or without HA-14 (1µM) for 3 hr, followed by flow cytometry to monitor the percentage of apoptotic (Annexin V+) cells. (B) RPMI8226 cells were exposed to SCH 10 nM or 15 nM with or without HA-14 1µM for 3 hr, after which cell extracts were immunoblotted to monitor expression of Mcl-1, Bcl-xL, Bcl-2, and cleaved caspase 9, caspase 3, and PARP. α-tubulin controls were assayed to ensure equivalent loading and transfer. (C) U266 and PS-R cells were exposed to SCH 10 nM with or without HA-14 (1µM) for 24 hr, after which cell death was analyzed by flow cytometry after staining with 7-AAD. Values represent means ± S.D. for three replicate determinations. \*\*\* = P < 0.001, significantly greater than values for individual agents.

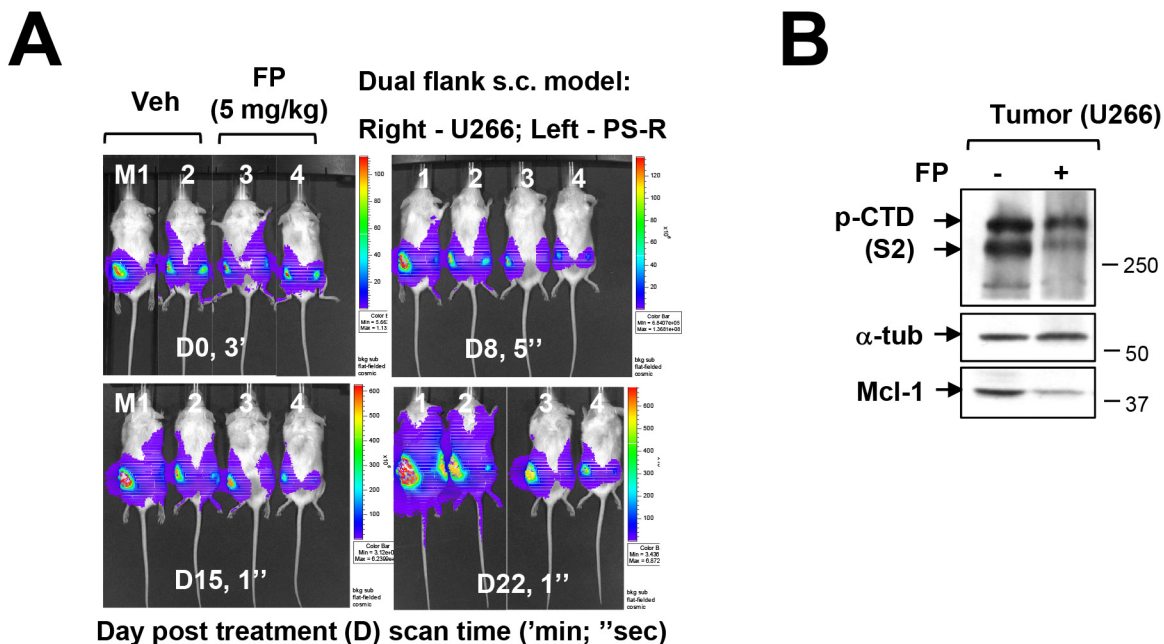

**Supplementary Figure 5: Alvocidib (FP) suppresses tumor growth of either drug-naïve or bortezomib-resistant cells in a dual flank murine model in association with Pol II inhibition and Mcl-1 downregulation.** (A and B) NOD/SCID- $\gamma$  mice were subcutaneously inoculated in the right rear flank with  $5 \times 10^6$  U266 cells stably expressing luciferase, and the left rear flank with  $5 \times 10^6$  PS-R (bortezomib-resistant U266) cells stably expressing luciferase. Treatment was initiated after luciferase activity was detected (7 days after injection of tumor cells). Mice were treated with FP (5 mg/kg) via intraperitoneal (i.p.) injection daily 5 days a week for 4 weeks. Control animals were administered equal volumes of vehicle. Tumor growth was monitored every other day after i.p. injection with 150 mg/kg luciferin using the Xenogen IVIS 200 imaging system. When tumor size reached 2,000 mm<sup>3</sup>, all mice were euthanized, and tumors removed and subjected to immunoblot analysis for phosphorylated CTD (serine-2) and Mcl-1 levels. Each lane was loaded with 30  $\mu$ g of protein, and  $\alpha$ -tubulin controls were assayed to ensure equivalent loading and transfer.

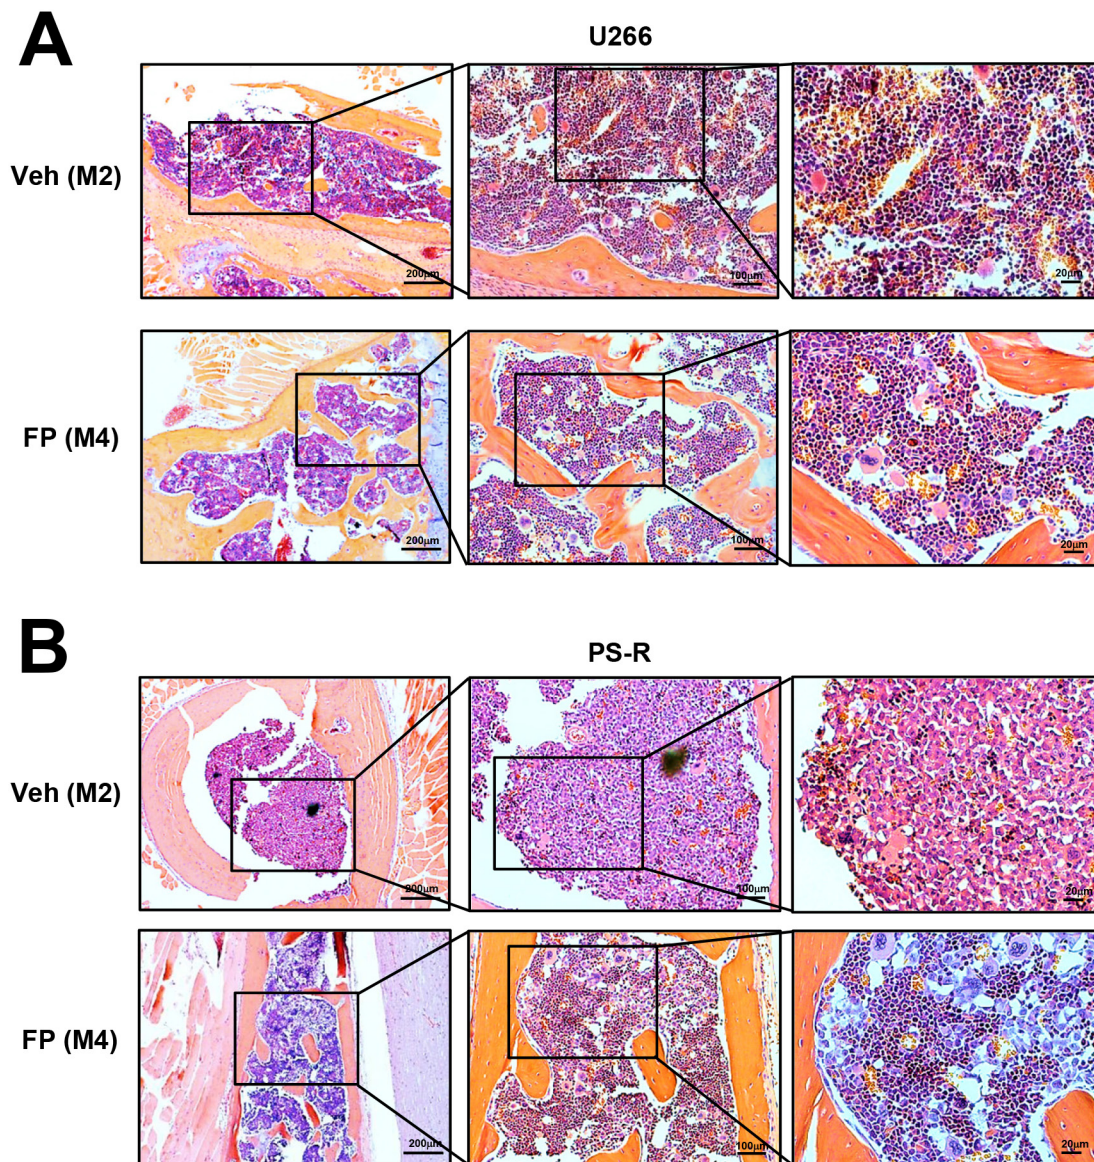

**Supplementary Figure 6: Alvocidib (FP) restores the BM structure.** Long bone tissue sections from vehicle, and FP-treated animals (Figure 8A, systemic models) were stained by H&E, and images obtained with an IX71-Olympus inverted system microscope. Scale bar = 200 μm; 100 μm; 20 μm.
